# Supplementary material for: Protocol for the PACE trial: A randomised controlled trial of adaptive pacing, cognitive behaviour therapy, and graded exercise as supplements to standardised specialist medical care versus standardised specialist medical care alone for patients with the chronic fatigue syndrome/myalgic encephalomyelitis or encephalopathy
Source: Springer Nature journal article supplement (doi:10.1186/1471-2377-7-6), 2007-03-08
Supplement: 12883_2006_128_MOESM1_ESM.pdf [file 12883_2006_128_MOESM1_ESM.pdf]

600 eligible consenting participants

Baseline assessments  
visit 1 and visit 2

**RANDOMISE**

APT + SSMC

CBT + SSMC

GET + SSMC

SSMC Alone

Mid-treatment assessment visit 3, at 12 weeks

Main treatment cessation after 23 weeks

End of treatment assessment visit 4, at 24 weeks

Treatment booster session at 36 weeks

Follow-up assessment visit 5, at 52 weeks
